# Supplementary material for: Methanol synthesis from CO2and H2using supported Pd alloy catalysts
Source: Royal Society of Chemistry journal article supplement (doi:10.1039/d2fd00119e), 2022-06-21
Supplement: d2fd00119e1.pdf [file d2fd00119e1.pdf]

### Supplementary Information

#### **Methanol synthesis from CO<sub>2</sub> and H<sub>2</sub> using supported Pd alloy catalysts.**

Naomi Lawes, Isla E. Gow, Louise R. Smith, Kieran J. Aggett, James S. Hayward, Lara Kabalan, Andrew J. Logsdail, Thomas J. A. Slater, Malcolm Dearg, David J. Morgan, Nicholas F. Dummer, Stuart H. Taylor, Michael Bowker, C. Richard A. Catlow, Graham J. Hutchings\*

Max Planck- Cardiff Centre on the Fundamentals of Heterogeneous Catalysis FUNCAT, Cardiff Catalysis Institute, School of Chemistry, Cardiff University, Main Building, Park Place, Cardiff, CF10 3AT, United Kingdom.

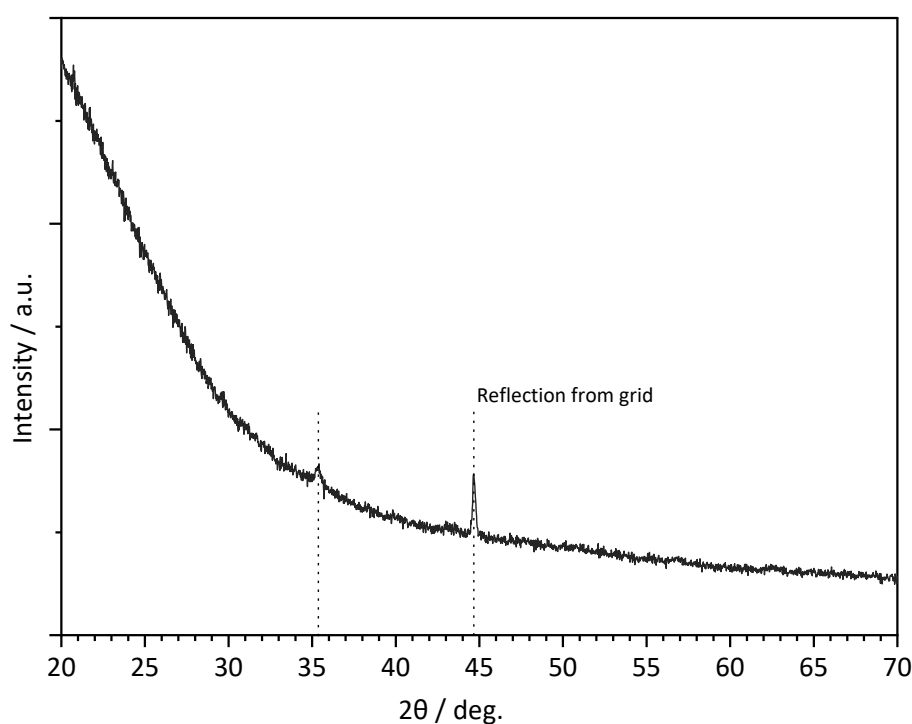

**Figure S1:** XRD from the SiO<sub>2</sub> blank and the XRD support grid.

**Table S1:** Tabulated product selectivity for the calcined Pd/Ga<sub>2</sub>O<sub>3</sub> catalyst, at different isothermal temperature regions.

| Temperature / °C | Methane | CO   | Methanol |
|------------------|---------|------|----------|
| 175              | 0       | 86.9 | 13.1     |
| 175              | 0       | 87.1 | 12.9     |
| 175              | 0       | 85.1 | 14.9     |
| 175              | 0       | 83.0 | 17.0     |
| 200              | 0       | 86.1 | 13.9     |
| 200              | 0       | 78.0 | 22.0     |

|     |     |      |      |
|-----|-----|------|------|
| 200 | 0.2 | 72.8 | 27.1 |
| 200 | 0.1 | 66.1 | 33.8 |
| 225 | 0.2 | 48.3 | 51.5 |
| 225 | 0.1 | 43.6 | 56.3 |
| 225 | 0.1 | 42.1 | 57.8 |
| 225 | 0.1 | 40.9 | 59.0 |
| 250 | 0.1 | 47.0 | 52.9 |
| 250 | 0.1 | 47.2 | 52.7 |
| 250 | 0.1 | 47.4 | 52.5 |

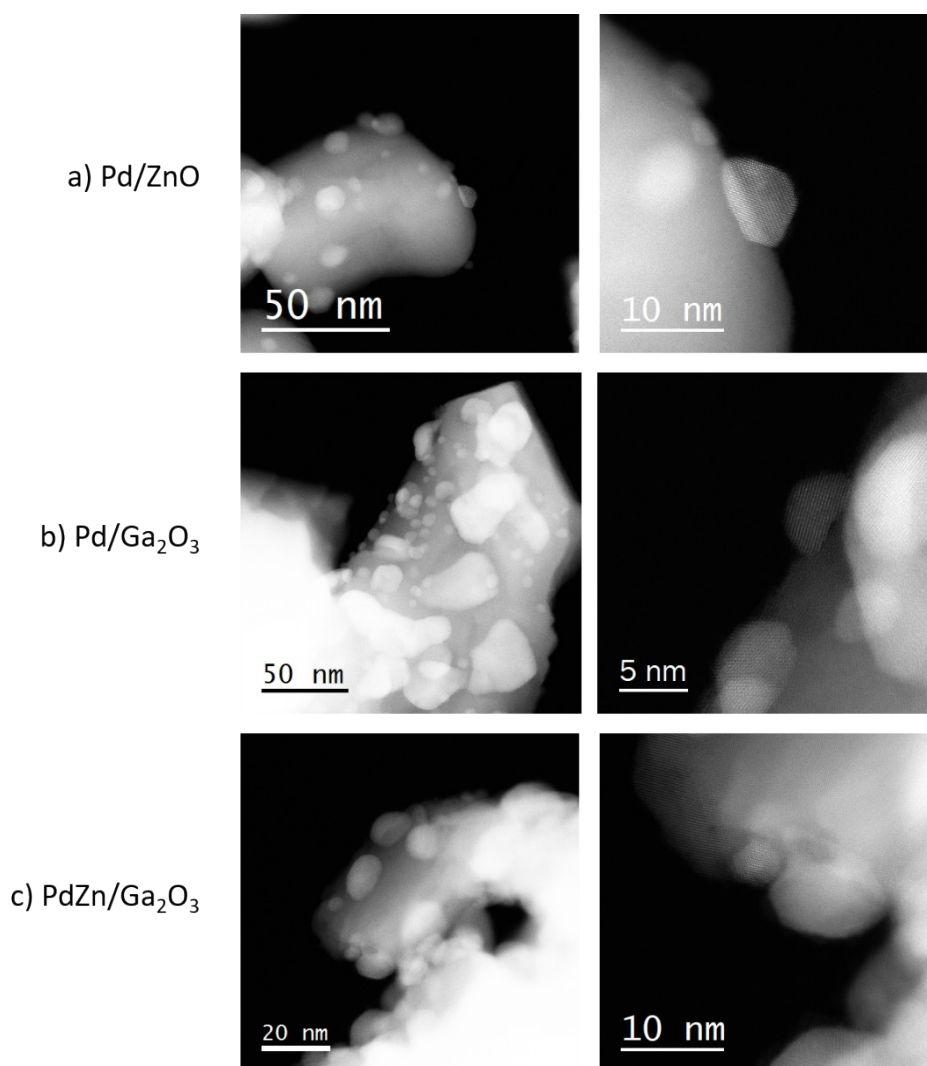

**Figure S2:** HAADF-STEM images of a) Pd/ZnO, b) Pd/Ga<sub>2</sub>O<sub>3</sub> and c) PdZn/Ga<sub>2</sub>O<sub>3</sub> after reduction at 400°C.

### DFT calculations

Table S2: Detailed comparison between experimental and DFT optimised structures, respectively:  $a_0$ ,  $b_0$ ,  $c_0$  are lattice parameters (in Å) for structures taken from the ICSD library

before optimisation; and  $a$ ,  $b$ ,  $c$  are the corresponding relaxed lattice vectors. Similarly,  $x$ ,  $y$ ,  $z$  are the angles (in degrees) for the structures taken from the ICSD, and  $x_0$ ,  $y_0$  and  $z_0$  are the angles of the optimised cell.

|                                 | $a_0$             | $b_0$ | $c_0$  | $a$   | $b$   | $c$   | $x_0$ | $y_0$ | $z_0$ | $x$ | $y$   | $z$ | <i>Ref</i> |
|---------------------------------|-------------------|-------|--------|-------|-------|-------|-------|-------|-------|-----|-------|-----|------------|
| Pd <sub>2</sub> Zn              | 3.06              | 3.06  | 9.57   | 2.88  | 2.88  | 10.28 | 90    | 90    | 90    | 90  | 90    | 90  | 1          |
| PdZn                            | 2.90 <sup>2</sup> | 2.90  | 3.38   | 2.87  | 2.87  | 3.37  | 90    | 90    | 90    | 90  | 90    | 90  | 2          |
| PdZn <sub>2</sub>               | 7.53              | 7.36  | 12.307 | 7.49  | 7.47  | 11.97 | 90    | 90    | 90    | 90  | 90    | 90  | 3          |
| InPd <sub>3</sub>               | 4.03              | 4.03  | 4.03   | 4.00  | 4.00  | 4.00  | 90    | 90    | 90    | 90  | 90    | 90  | 4          |
| InPd <sub>2</sub>               | 5.61              | 4.22  | 8.29   | 5.67  | 4.23  | 8.28  | 90    | 90    | 90    | 90  | 90    | 90  | 5          |
| In <sub>3</sub> Pd <sub>5</sub> | 5.60              | 11.02 | 4.24   | 5.65  | 11.15 | 4.25  | 90    | 90    | 90    | 90  | 90    | 90  | 6          |
| InPd                            | 3.25              | 3.25  | 3.25   | 3.27  | 3.27  | 3.27  | 90    | 90    | 90    | 90  | 90    | 90  | 7          |
| In <sub>3</sub> Pd <sub>2</sub> | 4.52              | 4.52  | 4.59   | 5.42  | 4.57  | 4.58  | 90    | 90    | 120   | 90  | 90    | 120 | 7          |
| In <sub>7</sub> Pd <sub>3</sub> | 9.43              | 9.43  | 9.43   | 9.50  | 9.50  | 9.50  | 90    | 90    | 90    | 90  | 90    | 90  | 8          |
| Pd <sub>7</sub> Ga <sub>3</sub> | 13.56             | 4.06  | 5.44   | 13.56 | 4.06  | 5.49  | 90    | 105.2 | 90    | 90  | 105.2 | 90  | 9          |
| Pd <sub>2</sub> Ga              | 5.48              | 4.06  | 7.79   | 5.51  | 4.05  | 7.79  | 90    | 90    | 90    | 90  | 90    | 90  | 10         |
| Pd <sub>5</sub> Ga <sub>3</sub> | 5.42              | 10.56 | 4.03   | 5.45  | 10.58 | 4.01  | 90    | 90    | 90    | 90  | 90    | 90  | 11         |
| PdGa                            | 4.90              | 4.90  | 4.90   | 4.89  | 4.89  | 4.89  | 90    | 90    | 90    | 90  | 90    | 90  | 12         |
| Pd <sub>3</sub> Ga <sub>7</sub> | 8.77              | 8.77  | 8.77   | 8.76  | 8.76  | 8.76  | 90    | 90    | 90    | 90  | 90    | 90  | 10         |

#### References:

1. Fitch, J. Aerosol synthesis and Rietveld refinement of Pd<sub>2</sub>Zn Recommended Citation. (2013).
2. Peterson, E. J. *et al.* Aerosol synthesis and Rietveld analysis of tetragonal ( $\beta$ 1) PdZn. *J. Alloys Compd.* **509**, 1463–1470 (2011).
3. Alasafi, K. M., Chattopadhyay, T. & Schubert, K. Zur Mischung PdZnN. *J. Less-Common Met.* **59**, 41–50 (1978).
4. Kohlmann, H. Hydrogenation of palladium rich compounds of aluminium, gallium and indium. *J. Solid State Chem.* **183**, 367–372 (2010).
5. Schubert, K. *et al.* *230 Kurze Originalmitteilungen Die Natur-Max-Planck-Forschung in Stuttgart.*
6. Zeitschrift für Metallkunde : international journal of materials research and advanced techniques - Technische Informationsbibliothek (TIB). <https://www.tib.eu/en/suchen/id/TIBKAT:12947424X/Zeitschrift-für-Metallkunde-international-journal/>.
7. Hellner, Erwin; Laves, F. Kristallchemie des In und Ga in Legierungen mit einigen Uebergangselementen (Ni, Pd, Pt, Cu, Ag und Au). *Zeitschrift fuer Naturforschung, Tl. A Astrophys. Phys. und Phys. Chemie* **2**, 177–183 (1947).
8. Häussermann, U., Elding-Ponte, M., Svensson, C., Lidin, S. & Burdett, J. K. *Compounds with the Ir 3 Ge 7 Structure Type: Interpenetrating Frameworks with Flexible Bonding Properties Dedicated to the memory of.*

9. Wannek, C. & Harbrecht, B. Phase equilibria in the palladium-rich part of the gallium–palladium system. The crystal structures of Ga<sub>3</sub>Pd<sub>7</sub> and Ga<sub>1-x</sub>Pd<sub>2+x</sub>. *J. Alloys Compd.* **316**, 99–106 (2001).
10. Armbrüster, M. *et al.* Pd-Ga intermetallic compounds as highly selective semihydrogenation catalysts. *J. Am. Chem. Soc.* **132**, 14745–14747 (2010).
11. Schubert, K. *et al.* Einige strukturelle Ergebnisse an metallischen Phasen III. *Naturwissenschaften 1958 4515* **45**, 360–361 (1958).
12. Armbrüster, M. *et al.* Refinement of the crystal structure of palladium gallium (1:1), PdGa. *Zeitschrift für Krist. - New Cryst. Struct.* **225**, 617–618 (2010).
